# Supplementary material for: The use of mid-regional proadrenomedullin to identify disease severity and treatment response to sepsis - a secondary analysis of a large randomised controlled trial
Source: Springer Nature journal article supplement (doi:10.1186/s13054-018-2001-5), 2018-03-21
Supplement: MOESM1 [file 15553288]

## Additional File 1

### The use of mid-regional proadrenomedullin to identify disease severity and treatment response to sepsis - a secondary analysis of a large randomized controlled trial

*Short title: The use of mid-regional proadrenomedullin to identify sepsis severity*

Gunnar Elke, M.D.<sup>1</sup>; Frank Bloos, M.D. Ph.D.<sup>2,3</sup>; Darius Cameron Wilson, Ph.D.<sup>4</sup>; Frank M. Brunkhorst, M.D.<sup>2,3</sup>; Josef Briegel, M.D.<sup>5</sup>; Konrad Reinhart, M.D.<sup>2,3</sup>; Markus Loeffler, M.D.<sup>6</sup>; Stefan Kluge, M.D.<sup>7</sup>; Axel Nierhaus, M.D. EDIC<sup>7</sup>; Ulrich Jaschinski, M.D.<sup>8</sup>; Onnen Moerer, M.D.<sup>9</sup>; Andreas Weyland, M.D.<sup>10</sup>; Patrick Meybohm, M.D.<sup>11</sup> for the SepNet Critical Care Trials Group

1 Dept. of Anaesthesiology and Intensive Care Medicine, University Medical Center Schleswig-Holstein, Campus Kiel, Germany

2 Dept. of Anesthesiology and Intensive Care Medicine, Jena University Hospital, Germany

3 Center for Sepsis Control & Care (CSCC), Jena University Hospital, Germany

4 B·R·A·H·M·S GmbH, Hennigsdorf, Germany

5 Dept. of Anaesthesiology, University Hospital Munich, Germany

6 Clinical Trial Centre Leipzig, University of Leipzig, Germany

7 Dept. of Intensive Care Medicine, University Hospital Hamburg-Eppendorf, Germany

8 Dept. of Anaesthesiology and Surgical Intensive Care Medicine, Hospital Augsburg, Germany

9 Dept. of Anaesthesiology, University Hospital Göttingen, Germany

10 Dept. of Anaesthesiology, Hospital Oldenburg, Germany

11 Dept. of Anaesthesiology, Intensive Care Medicine and Pain Therapy, University Hospital Frankfurt, Germany

#### Corresponding author

Gunnar Elke, M.D.

Department of Anaesthesiology and Intensive Care Medicine  
University Medical Center Schleswig-Holstein, Campus Kiel

Arnold-Heller-Str. 3 Haus 12

24105 Kiel, Germany

Tel: +49 431 500 20780

Fax: +49 431 500 20804

E-mail: [gunnar.elke@uksh.de](mailto:gunnar.elke@uksh.de)

ORCID: [0000-0002-4948-1605](https://orcid.org/0000-0002-4948-1605)

# CONTENTS

|                                      |                                                                                                                                     |
|--------------------------------------|-------------------------------------------------------------------------------------------------------------------------------------|
| <b>1. Supplementary Results.....</b> | <b>3</b>                                                                                                                            |
| 1.1                                  | Influence of infectious origin and microbial species on biomarker performance                                                       |
| 1.2                                  | Correlation of biomarkers and clinical scores with SOFA at baseline and day 1                                                       |
| 1.3                                  | Identification of high risk patients                                                                                                |
| 1.4                                  | Additional prognostic value of MR-proADM measurements to baseline concentrations                                                    |
| <b>2. Supplementary Tables.....</b>  | <b>4</b>                                                                                                                            |
| Table S1                             | Survival analysis for the addition of MR-proADM to baseline biomarkers or scores                                                    |
| Table S2                             | AUROC analysis for the addition of MR-proADM to baseline biomarkers or scores                                                       |
| Table S3                             | Net reclassification improvement analysis for baseline MR-proADM and biomarker/score combinations                                   |
| Table S4                             | Survival analysis for MR-proADM within different organ dysfunction severity groups when combined with baseline biomarkers or scores |
| Table S5                             | Characteristics of MR-proADM cut-offs at baseline                                                                                   |
| Table S6                             | SOFA and MR-proADM disease severity groups for 28 day mortality                                                                     |
| Table S7                             | SAPS II and MR-proADM disease severity groups for 28 day mortality                                                                  |
| Table S8                             | APACHE II and MR-proADM disease severity groups for 28 day mortality                                                                |
| Table S9                             | Lactate and MR-proADM disease severity groups for 28 day mortality                                                                  |
| Table S10                            | Biomarker and SOFA association with 28 day mortality at days 1, 4, 7 and 10                                                         |
| Table S11                            | Disease severity groups and corresponding mortality rates throughout ICU treatment                                                  |
| Table S12                            | Characteristics of low severity MR-proADM cut-offs at days 1, 4, 7 and 10                                                           |
| Table S13                            | 28 day mortality relative risk ratios for continuously maintained biomarker and score values                                        |
| Table S14                            | 7 day, ICU and Hospital mortality rates following PCT and MR-proADM kinetics between baseline and day 1                             |
| Table S15                            | ICU and Hospital mortality rates following PCT and MR-proADM kinetics between baseline and day 4                                    |
| Table S16                            | Baseline biomarker and clinical score correlation with SOFA at baseline and SOFA at day 1                                           |
| Table S17                            | Baseline MR-proADM correlations with SOFA subscores at baseline and on day 1                                                        |
| Table S18                            | Biomarker correlations with SOFA scores throughout ICU treatment                                                                    |
| Table S19                            | Time dependent Cox regressions for single and cumulative additions of MR-proADM                                                     |
| <b>3. Supplementary Figures.....</b> | <b>15</b>                                                                                                                           |
| Figure S1                            | 28 and 90 day mortality rates following PCT and MR-proADM kinetics between baseline and day 4                                       |
| Figure S2                            | Influence of infectious origin on 28 day mortality prediction                                                                       |
| Figure S3                            | Influence of microbial species on 28 day mortality prediction                                                                       |
| Figure S4                            | Influence of mode of ICU entry on 28 day mortality prediction                                                                       |

## 1. Supplementary Results

### 1.1 Influence of infectious origin and microbial species on biomarker performance

Infections originating from a single focus were found in 836 patients (77.7%), with pneumological (N = 324; 30.1%), intra-abdominal (N = 252; 23.4%), urogenital (N = 57; 5.3%) and bone/soft tissue (N = 50; 4.6%) origins most prevalent. Corresponding mortality rates were 26.5%, 24.6%, 22.8% and 28.0%, respectively. Multiple origins of infection were found in 240 (22.3%) patients. MR-proADM showed the strongest association with mortality in patients with solely pneumological and intra-abdominal infections, as well as in patients with solely Gram positive infections, irrespective of the infectious origin (**Figure S2-3**).

When patients were grouped according to operative emergency, non-operative emergency and elective surgery history resulting in admission to the ICU, MR-proADM provided the strongest and most balanced association with 28 day mortality across all groups (**Figure S4**).

### 1.2 Correlation of biomarkers and clinical scores with SOFA at baseline and day 1

MR-proADM had the highest correlation of all biomarkers with the SOFA score at baseline. This correlation was significantly increased when baseline MR-proADM values were correlated with day 1 SOFA scores. The greatest correlation could be found between MR-proADM and SOFA on day 10, with differences between individual SOFA subscores found throughout (**Table S16-18**).

### 1.3 Identification of high risk patients

The additional value of MR-proADM concentrations in the identification of high risk patients with low/intermediate SAPS II or APACHE II values could also be demonstrated. 124 patients (12.0%) were found to have high both MR-proADM concentrations and low/intermediate SAPS II values, resulting in an increased 28 and 90 day mortality rate of 54.8% and 65.6%, compared to a 28 and 90 day mortality rate of 19.7% and 30.0% in the remaining low/intermediate SAPS II population. This was also found to be the case when the APACHE II score was used, with the identification of 109 (10.6%) patients with high MR-proADM and low/intermediate APACHE II values, resulting in a 28 and 90 day mortality rate of 56.9% and 66.7%, as opposed to a 28 and 90 day mortality rate of 19.5% and 30.3% in the remaining low/intermediate APACHE II population.

### 1.4 Additional prognostic value of MR-proADM measurements to baseline concentrations

Time-dependent Cox regression analysis indicated that the earliest significant additional increase in prognostic information to MR-proADM baseline values could be observed on day 1, with subsequent or cumulative measurements resulting in significantly stronger associations with 28 day mortality (**Table S19**).

## 2. Supplementary Tables

**Table S1. Survival analysis for the addition of MR-proADM to baseline biomarkers or scores**

|                    | Biomarker or clinical score | Patients (N) | Mortality (N) | Bivariate Cox regression |         |                 | Added value |         | Multivariate Cox regression |         |                 | Added value |         |
|--------------------|-----------------------------|--------------|---------------|--------------------------|---------|-----------------|-------------|---------|-----------------------------|---------|-----------------|-------------|---------|
|                    |                             |              |               | LR $\chi^2$              | C-index | HR IQR [95% CI] | LR $\chi^2$ | p-value | LR $\chi^2$                 | C-index | HR IQR [95% CI] | LR $\chi^2$ | p-value |
| 7 day mortality    | PCT                         | 1037         | 131           | 76.5                     | 0.72    | 4.0 [2.9 - 5.6] | 66.8        | <0.001  | 86.2                        | 0.73    | 4.2 [2.9 - 6.1] | 57.8        | <0.001  |
|                    | CRP                         | 904          | 108           | 56.9                     | 0.71    | 3.2 [2.3 - 4.3] | 55.0        | <0.001  | 67.7                        | 0.73    | 3.3 [2.3 - 4.7] | 49.4        | <0.001  |
|                    | Lactate                     | 1029         | 131           | 112.5                    | 0.75    | 2.3 [1.7 - 3.1] | 28.1        | <0.001  | 125.1                       | 0.76    | 2.4 [1.7 - 3.3] | 26.4        | <0.001  |
|                    | SOFA                        | 1014         | 126           | 77.8                     | 0.72    | 3.3 [2.3 - 4.6] | 53.5        | <0.001  | 86.9                        | 0.74    | 3.3 [2.3 - 4.7] | 46.6        | <0.001  |
|                    | SAPS II                     | 1037         | 131           | 83.1                     | 0.73    | 2.8 [2.0 - 3.7] | 48.1        | <0.001  | 93.5                        | 0.74    | 2.9 [2.1 - 4.0] | 46.7        | <0.001  |
|                    | APACHE II                   | 1037         | 131           | 73.3                     | 0.71    | 3.0 [2.2 - 4.1] | 50.9        | <0.001  | 84.5                        | 0.73    | 3.1 [2.2 - 4.2] | 48.6        | <0.001  |
| 28 day mortality   | PCT                         | 1030         | 275           | 163.0                    | 0.73    | 4.3 [3.4 - 5.5] | 150.7       | <0.001  | 174.9                       | 0.73    | 3.9 [3.0 - 5.1] | 105.0       | <0.001  |
|                    | CRP                         | 898          | 239           | 114.4                    | 0.70    | 3.0 [2.5 - 3.8] | 114.2       | <0.001  | 132.4                       | 0.72    | 2.8 [2.2 - 3.6] | 80.5        | <0.001  |
|                    | Lactate                     | 1022         | 275           | 163.8                    | 0.72    | 2.7 [2.2 - 3.3] | 85.9        | <0.001  | 184.5                       | 0.73    | 2.5 [2.0 - 3.1] | 61.4        | <0.001  |
|                    | SOFA                        | 1007         | 268           | 150.6                    | 0.72    | 3.1 [2.5 - 3.9] | 104.1       | <0.001  | 169.9                       | 0.73    | 2.8 [2.2 - 3.6] | 74.4        | <0.001  |
|                    | SAPS II                     | 1030         | 275           | 163.4                    | 0.72    | 2.7 [2.2 - 3.3] | 97.1        | <0.001  | 176.5                       | 0.73    | 2.6 [2.1 - 3.3] | 79.1        | <0.001  |
|                    | APACHE II                   | 1030         | 275           | 153.6                    | 0.72    | 2.7 [2.2 - 3.4] | 88.8        | <0.001  | 169.1                       | 0.73    | 2.6 [2.1 - 3.3] | 74.1        | <0.001  |
| 90 day mortality   | PCT                         | 1000         | 379           | 170.8                    | 0.70    | 3.6 [3.0 - 4.4] | 159.0       | <0.001  | 208.2                       | 0.71    | 3.1 [2.5 - 3.9] | 94.8        | <0.001  |
|                    | CRP                         | 872          | 331           | 116.0                    | 0.68    | 2.6 [2.2 - 3.1] | 116.0       | <0.001  | 160.3                       | 0.70    | 2.3 [1.9 - 2.8] | 68.8        | <0.001  |
|                    | Lactate                     | 993          | 379           | 169.4                    | 0.69    | 2.3 [1.9 - 2.7] | 86.6        | <0.001  | 217.5                       | 0.71    | 2.0 [1.7 - 2.4] | 50.2        | <0.001  |
|                    | SOFA                        | 977          | 368           | 151.0                    | 0.69    | 2.6 [2.1 - 3.1] | 103.1       | <0.001  | 200.6                       | 0.71    | 2.2 [1.8 - 2.7] | 59.9        | <0.001  |
|                    | SAPS II                     | 1000         | 379           | 173.7                    | 0.70    | 2.3 [1.9 - 2.7] | 94.7        | <0.001  | 208.4                       | 0.71    | 2.2 [1.8 - 2.6] | 67.6        | <0.001  |
|                    | APACHE II                   | 1000         | 379           | 165.0                    | 0.70    | 2.3 [1.9 - 2.7] | 83.3        | <0.001  | 202.9                       | 0.71    | 2.1 [1.8 - 2.6] | 62.5        | <0.001  |
| ICU mortality      | PCT                         | 1023         | 264           | 149.5                    | 0.75    | 5.7 [4.1 - 7.9] | 131.4       | <0.001  | 165.3                       | 0.76    | 4.9 [3.5 - 7.0] | 92.6        | <0.001  |
|                    | CRP                         | 889          | 226           | 104.6                    | 0.72    | 3.7 [2.8 - 4.8] | 102.5       | <0.001  | 127.4                       | 0.74    | 3.4 [2.5 - 4.6] | 75.6        | <0.001  |
|                    | Lactate                     | 1015         | 264           | 153.5                    | 0.74    | 3.2 [2.4 - 4.2] | 78.9        | <0.001  | 175.6                       | 0.76    | 2.9 [2.2 - 3.9] | 57.5        | <0.001  |
|                    | SOFA                        | 1000         | 257           | 140.7                    | 0.74    | 3.6 [2.7 - 4.8] | 91.8        | <0.001  | 163.8                       | 0.76    | 3.2 [2.4 - 4.4] | 65.8        | <0.001  |
|                    | SAPS II                     | 1023         | 264           | 152.5                    | 0.75    | 3.4 [2.6 - 4.4] | 94.4        | <0.001  | 169.2                       | 0.76    | 3.3 [2.5 - 4.3] | 77.7        | <0.001  |
|                    | APACHE II                   | 1023         | 264           | 148.2                    | 0.74    | 3.3 [2.5 - 4.4] | 87.9        | <0.001  | 165.7                       | 0.76    | 3.3 [2.5 - 4.3] | 75.6        | <0.001  |
| Hospital mortality | PCT                         | 980          | 323           | 174.7                    | 0.76    | 6.4 [4.6 - 8.8] | 159.5       | <0.001  | 198.9                       | 0.77    | 5.2 [3.6 - 7.3] | 103.2       | <0.001  |
|                    | CRP                         | 852          | 283           | 117.9                    | 0.72    | 3.7 [2.9 - 4.8] | 117.3       | <0.001  | 150.1                       | 0.75    | 3.3 [2.5 - 4.3] | 77.7        | <0.001  |
|                    | Lactate                     | 972          | 323           | 167.4                    | 0.75    | 3.3 [2.5 - 4.3] | 89.2        | <0.001  | 202.5                       | 0.76    | 2.8 [2.1 - 3.8] | 57.6        | <0.001  |
|                    | SOFA                        | 957          | 314           | 155.5                    | 0.74    | 3.9 [3.0 - 5.2] | 113.7       | <0.001  | 191.3                       | 0.76    | 3.4 [2.5 - 4.5] | 74.6        | <0.001  |
|                    | SAPS II                     | 980          | 323           | 165.8                    | 0.75    | 3.5 [2.7 - 4.5] | 107.7       | <0.001  | 194.2                       | 0.76    | 3.2 [2.4 - 4.2] | 81.3        | <0.001  |
|                    | APACHE II                   | 980          | 323           | 169.7                    | 0.75    | 3.3 [2.6 - 4.3] | 95.4        | <0.001  | 197.2                       | 0.76    | 3.1 [2.4 - 4.1] | 75.1        | <0.001  |

HR IQR [95% CI] indicates the hazard ratio for MR-proADM in each bivariate or multivariate model. 2 degrees of freedom in each bivariate model, compared to 11 in each multivariate model. Additional combination data not shown.

APACHE II: Acute Physiological and Chronic Health Evaluation II score; CI: Confidence Interval; CRP: C-reactive protein; HR: Hazard Ratio; IQR: Interquartile range; MR-proADM: Mid-regional proadrenomedullin; N: Number; PCT: Procalcitonin; SOFA: Sequential Organ Failure Assessment score; SAPS II: Simplified Acute Physiological II score.

**Table S2. AUROC analysis for the addition of MR-proADM to baseline biomarkers or scores**

|                    | Biomarker or score | AUROC [95% CI]     | Biomarker or score + MR-proADM | AUROC [95% CI]     |
|--------------------|--------------------|--------------------|--------------------------------|--------------------|
| 7 day mortality    | MR-proADM          | 0.72 [0.67 - 0.77] |                                |                    |
|                    | PCT                | 0.58 [0.53 - 0.63] | PCT                            | 0.73 [0.68 - 0.78] |
|                    | CRP                | 0.55 [0.49 - 0.61] | CRP                            | 0.72 [0.66 - 0.77] |
|                    | Lactate            | 0.72 [0.67 - 0.77] | Lactate                        | 0.75 [0.71 - 0.80] |
|                    | SOFA               | 0.64 [0.59 - 0.68] | SOFA                           | 0.73 [0.68 - 0.78] |
|                    | SAPS II            | 0.66 [0.62 - 0.71] | SAPS II                        | 0.73 [0.68 - 0.78] |
|                    | APACHE II          | 0.63 [0.58 - 0.68] | APACHE II                      | 0.72 [0.67 - 0.77] |
| 28 day mortality   | MR-proADM          | 0.73 [0.70 - 0.77] |                                |                    |
|                    | PCT                | 0.56 [0.52 - 0.60] | PCT                            | 0.76 [0.72 - 0.79] |
|                    | CRP                | 0.49 [0.45 - 0.53] | CRP                            | 0.73 [0.69 - 0.76] |
|                    | Lactate            | 0.65 [0.61 - 0.69] | Lactate                        | 0.74 [0.70 - 0.77] |
|                    | SOFA               | 0.64 [0.60 - 0.68] | SOFA                           | 0.74 [0.71 - 0.78] |
|                    | SAPS II            | 0.67 [0.63 - 0.70] | SAPS II                        | 0.75 [0.72 - 0.78] |
|                    | APACHE II          | 0.67 [0.64 - 0.70] | APACHE II                      | 0.75 [0.71 - 0.78] |
| 90 day mortality   | MR-proADM          | 0.71 [0.68 - 0.74] |                                |                    |
|                    | PCT                | 0.55 [0.51 - 0.59] | PCT                            | 0.73 [0.70 - 0.77] |
|                    | CRP                | 0.50 [0.46 - 0.53] | CRP                            | 0.70 [0.67 - 0.74] |
|                    | Lactate            | 0.64 [0.60 - 0.67] | Lactate                        | 0.72 [0.68 - 0.75] |
|                    | SOFA               | 0.63 [0.59 - 0.66] | SOFA                           | 0.72 [0.68 - 0.75] |
|                    | SAPS II            | 0.66 [0.63 - 0.69] | SAPS II                        | 0.73 [0.70 - 0.76] |
|                    | APACHE II          | 0.67 [0.64 - 0.70] | APACHE II                      | 0.73 [0.70 - 0.76] |
| ICU mortality      | MR-proADM          | 0.73 [0.70 - 0.77] |                                |                    |
|                    | PCT                | 0.58 [0.54 - 0.62] | PCT                            | 0.75 [0.71 - 0.78] |
|                    | CRP                | 0.54 [0.49 - 0.58] | CRP                            | 0.72 [0.68 - 0.76] |
|                    | Lactate            | 0.66 [0.62 - 0.70] | Lactate                        | 0.74 [0.71 - 0.78] |
|                    | SOFA               | 0.64 [0.60 - 0.68] | SOFA                           | 0.75 [0.70 - 0.77] |
|                    | SAPS II            | 0.65 [0.61 - 0.69] | SAPS II                        | 0.75 [0.71 - 0.78] |
|                    | APACHE II          | 0.66 [0.62 - 0.69] | APACHE II                      | 0.74 [0.71 - 0.78] |
| Hospital mortality | MR-proADM          | 0.74 [0.70 - 0.77] |                                |                    |
|                    | PCT                | 0.57 [0.53 - 0.61] | PCT                            | 0.76 [0.72 - 0.79] |
|                    | CRP                | 0.52 [0.48 - 0.56] | CRP                            | 0.72 [0.69 - 0.76] |
|                    | Lactate            | 0.66 [0.62 - 0.67] | Lactate                        | 0.75 [0.71 - 0.78] |
|                    | SOFA               | 0.63 [0.59 - 0.66] | SOFA                           | 0.74 [0.71 - 0.77] |
|                    | SAPS II            | 0.65 [0.61 - 0.68] | SAPS II                        | 0.75 [0.71 - 0.78] |
|                    | APACHE II          | 0.67 [0.63 - 0.70] | APACHE II                      | 0.75 [0.72 - 0.78] |

AUROC: Area Under the Receiver Operating Characteristic; APACHE II: Acute Physiological and Chronic Health Evaluation II score; CI: Confidence Interval; CRP: C-reactive protein; MR-proADM: Mid-regional proadrenomedullin; PCT: Procalcitonin; SAPS II: Simplified Acute Physiological II score; SOFA: Sequential Organ Failure Assessment score

**Table S3.** Net reclassification improvement analysis for baseline MR-proADM and biomarker/score combinations

|                  | Biomarker or score | NRI total population [95% CI] | NRI survivors [95% CI] | NRI non-survivors [95% CI] |
|------------------|--------------------|-------------------------------|------------------------|----------------------------|
| 28 day mortality | PCT                | 0.79 [0.62 - 0.91]            | 0.39 [0.29 - 0.46]     | 0.40 [0.30 - 0.48]         |
|                  | CRP                | 0.67 [0.53 - 0.81]            | 0.30 [0.23 - 0.38]     | 0.37 [0.27 - 0.45]         |
|                  | Lactate            | 0.66 [0.52 - 0.80]            | 0.31 [0.23 - 0.38]     | 0.35 [0.27 - 0.43]         |
|                  | SOFA               | 0.63 [0.48 - 0.76]            | 0.29 [0.22 - 0.36]     | 0.34 [0.24 - 0.42]         |
|                  | SAPS II            | 0.62 [0.48 - 0.74]            | 0.25 [0.19 - 0.33]     | 0.37 [0.26 - 0.43]         |
|                  | APACHE II          | 0.54 [0.42 - 0.69]            | 0.23 [0.15 - 0.32]     | 0.31 [0.24 - 0.40]         |
| 90 day mortality | PCT                | 0.73 [0.61 - 0.84]            | 0.36 [0.29 - 0.43]     | 0.37 [0.29 - 0.43]         |
|                  | CRP                | 0.61 [0.47 - 0.74]            | 0.31 [0.23 - 0.37]     | 0.30 [0.22 - 0.38]         |
|                  | Lactate            | 0.58 [0.45 - 0.71]            | 0.29 [0.20 - 0.36]     | 0.29 [0.22 - 0.38]         |
|                  | SOFA               | 0.56 [0.43 - 0.69]            | 0.27 [0.20 - 0.35]     | 0.29 [0.22 - 0.36]         |
|                  | SAPS II            | 0.55 [0.42 - 0.67]            | 0.25 [0.17 - 0.32]     | 0.30 [0.23 - 0.37]         |
|                  | APACHE II          | 0.50 [0.37 - 0.61]            | 0.22 [0.14 - 0.28]     | 0.28 [0.21 - 0.36]         |

APACHE II: Acute Physiological and Chronic Health Evaluation II score; CI: Confidence Interval; CRP: C-reactive protein; MR-proADM: Mid-regional proadrenomedullin; NRI: Net Reclassification Improvement; PCT: Procalcitonin; SAPS II: Simplified Acute Physiological II score; SOFA: Sequential Organ Failure Assessment score

**Table S4. Survival analysis for MR-proADM within different organ dysfunction severity groups when combined with baseline biomarkers or scores**

|                | Biomarker or clinical score | Patients (N) | Mortality (N) | Bivariate Cox regression |         |                  |         | Multivariate Cox regression |         |                  |         |
|----------------|-----------------------------|--------------|---------------|--------------------------|---------|------------------|---------|-----------------------------|---------|------------------|---------|
|                |                             |              |               | LR $\chi^2$              | C-index | HR IQR [95% CI]  | p-value | LR $\chi^2$                 | C-index | HR IQR [95% CI]  | p-value |
| SOFA $\leq 7$  | PCT                         | 232          | 32            | 30.0                     | 0.75    | 5.3 [2.8 - 10.1] | <0.001  | 41.8                        | 0.78    | 5.0 [2.3 - 10.8] | <0.001  |
|                | CRP                         | 204          | 29            | 20.1                     | 0.71    | 3.1 [1.8 - 5.3]  | <0.001  | 30.5                        | 0.75    | 2.7 [1.4 - 5.0]  | 0.001   |
|                | Lactate                     | 229          | 32            | 25.1                     | 0.72    | 3.5 [2.0 - 5.9]  | <0.001  | 37.2                        | 0.77    | 3.1 [1.7 - 5.7]  | <0.001  |
|                | SOFA                        | 232          | 32            | 27.3                     | 0.73    | 3.9 [2.3 - 6.7]  | <0.001  | 40.4                        | 0.78    | 3.5 [1.9 - 6.5]  | <0.001  |
|                | SAPS II                     | 232          | 32            | 28.9                     | 0.74    | 3.2 [1.9 - 5.4]  | <0.001  | 38.4                        | 0.78    | 3.1 [1.7 - 5.5]  | <0.001  |
|                | APACHE II                   | 232          | 32            | 34.2                     | 0.77    | 2.9 [1.7 - 4.9]  | <0.001  | 41.4                        | 0.79    | 3.0 [1.7 - 5.5]  | <0.001  |
| SOFA 8 - 13    | PCT                         | 620          | 172           | 90.4                     | 0.72    | 3.8 [2.8 - 5.0]  | <0.001  | 98.0                        | 0.72    | 3.2 [2.3 - 4.4]  | <0.001  |
|                | CRP                         | 544          | 153           | 63.1                     | 0.69    | 2.6 [2.0 - 3.3]  | <0.001  | 78.6                        | 0.71    | 2.4 [1.7 - 2.9]  | <0.001  |
|                | Lactate                     | 617          | 172           | 81.4                     | 0.70    | 2.4 [1.9 - 3.1]  | <0.001  | 97.0                        | 0.72    | 2.1 [1.6 - 2.7]  | <0.001  |
|                | SOFA                        | 620          | 172           | 76.2                     | 0.70    | 2.6 [2.0 - 3.2]  | <0.001  | 90.7                        | 0.72    | 2.3 [1.8 - 2.9]  | <0.001  |
|                | SAPS II                     | 620          | 172           | 87.2                     | 0.71    | 2.4 [1.9 - 3.1]  | <0.001  | 97.2                        | 0.72    | 2.3 [1.8 - 2.9]  | <0.001  |
|                | APACHE II                   | 620          | 172           | 79.0                     | 0.70    | 2.5 [1.9 - 3.1]  | <0.001  | 90.9                        | 0.72    | 2.3 [1.8 - 2.9]  | <0.001  |
| SOFA $\geq 14$ | PCT                         | 155          | 64            | 16.3                     | 0.66    | 2.2 [1.5 - 3.2]  | 0.001   | 27.1                        | 0.69    | 2.4 [1.5 - 3.9]  | 0.001   |
|                | CRP                         | 134          | 52            | 13.4                     | 0.65    | 1.9 [1.3 - 2.9]  | 0.001   | 26.9                        | 0.70    | 2.1 [1.3 - 3.3]  | 0.001   |
|                | Lactate                     | 155          | 64            | 28.9                     | 0.69    | 1.7 [1.1 - 2.5]  | 0.006   | 38.1                        | 0.71    | 1.8 [1.1 - 2.8]  | 0.007   |
|                | SOFA                        | 155          | 64            | 15.3                     | 0.65    | 2.0 [1.3 - 2.9]  | <0.001  | 26.7                        | 0.69    | 2.1 [1.3 - 3.2]  | <0.001  |
|                | SAPS II                     | 155          | 64            | 17.0                     | 0.65    | 2.1 [1.4 - 3.1]  | <0.001  | 26.2                        | 0.69    | 2.2 [1.4 - 3.3]  | <0.001  |
|                | APACHE II                   | 155          | 64            | 15.1                     | 0.64    | 2.0 [1.3 - 2.9]  | <0.001  | 25.7                        | 0.69    | 2.1 [1.4 - 3.3]  | <0.001  |

HR IQR [95% CI] indicates the hazard ratio for MR-proADM in each bivariate or multivariate model. *APACHE II*: Acute Physiological and Chronic Health Evaluation II score; *CI*: Confidence Interval; *CRP*: C-reactive protein; *HR*: Hazard Ratio; *IQR*: Interquartile range; *MR-proADM*: Mid-regional proadrenomedullin; *N*: Number; *PCT*: Procalcitonin; *SAPS II*: Simplified Acute Physiological II score; *SOFA*: Sequential Organ Failure Assessment score

**Table S5. Characteristics of MR-proADM cut-offs at baseline**

| MR-proADM cut-off (nmol/L) | Sensitivity        | Specificity        | PPV                | NPV                | LR+                | LR-                |
|----------------------------|--------------------|--------------------|--------------------|--------------------|--------------------|--------------------|
| 2.75                       | 0.90 [0.86 - 0.93] | 0.32 [0.29 - 0.36] | 0.33 [0.29 - 0.36] | 0.90 [0.85 - 0.93] | 1.32 [1.24 - 1.41] | 0.32 [0.22 - 0.46] |
| 10.9                       | 0.33 [0.27 - 0.38] | 0.90 [0.88 - 0.92] | 0.55 [0.47 - 0.62] | 0.79 [0.76 - 0.81] | 3.29 [2.51 - 4.33] | 0.75 [0.69 - 0.81] |

*LR+*: Positive likelihood ratio; *LR-*: Negative likelihood ratio; *MR-proADM*: Mid-regional proadrenomedullin; *NPV*: Negative predictive value; *PPV*: Positive predictive value

**Table S6. SOFA and MR-proADM disease severity groups for 28 day mortality**

|                           |                                                                          | SOFA severity groups                                    |                                                                      |                                                           |
|---------------------------|--------------------------------------------------------------------------|---------------------------------------------------------|----------------------------------------------------------------------|-----------------------------------------------------------|
| MR-proADM severity groups |                                                                          | Low severity<br>(≤7 points)<br>N = 232, 13.8% mortality | Intermediate severity<br>(≥8 points ≤13)<br>N = 620, 27.7% mortality | High severity<br>(≥14 points)<br>N = 155, 41.3% mortality |
|                           | Low severity<br>(≤2.7 nmol/L)<br>N = 265, 9.8% mortality                 | N = 111 (41.9%)<br>7.2% mortality                       | N = 139 (52.8%)<br>10.8% mortality                                   | N = 15 (5.7%)<br>20.0% mortality                          |
|                           | Intermediate severity<br>(>2.7 nmol/L ≤10.9)<br>N = 581, 26.2% mortality | N = 114 (19.6%)<br>15.8% mortality                      | N = 394 (68.0%)<br>27.7% mortality                                   | N = 73 (12.6%)<br>34.2% mortality                         |
|                           | High severity<br>(>10.9 nmol/L)<br>N = 161, 55.9% mortality              | N = 7 (4.3%)<br>85.7% mortality                         | N = 87 (53.4%)<br>55.2% mortality                                    | N = 67 (41.6%)<br>53.7% mortality                         |

MR-proADM: Mid-regional proadrenomedullin; N: Number; SOFA: Sequential Organ Failure Assessment score

**Table S7. SAPS II and MR-proADM disease severity groups for 28 day mortality**

|                           |                                                                          | SAPS II severity groups                                  |                                                                       |                                                           |
|---------------------------|--------------------------------------------------------------------------|----------------------------------------------------------|-----------------------------------------------------------------------|-----------------------------------------------------------|
| MR-proADM severity groups |                                                                          | Low severity<br>(≤53 points)<br>N = 235, 11.5% mortality | Intermediate severity<br>(≥54 points ≤79)<br>N = 656, 29.3% mortality | High severity<br>(≥80 points)<br>N = 139, 40.3% mortality |
|                           | Low severity<br>(≤2.7 nmol/L)<br>N = 271, 10.3% mortality                | N = 108 (39.9%)<br>7.4% mortality                        | N = 143 (52.8%)<br>11.2% mortality                                    | N = 20 (7.4%)<br>20.0% mortality                          |
|                           | Intermediate severity<br>(>2.7 nmol/L ≤10.9)<br>N = 594, 26.4% mortality | N = 118 (19.9%)<br>13.6% mortality                       | N = 398 (67.0%)<br>27.9% mortality                                    | N = 78 (13.1%)<br>38.5% mortality                         |
|                           | High severity<br>(>10.9 nmol/L)<br>N = 165, 54.5% mortality              | N = 9 (5.5%)<br>33.3% mortality                          | N = 115 (69.7%)<br>56.5% mortality                                    | N = 41 (24.8%)<br>53.7% mortality                         |

MR-proADM: Mid-regional proadrenomedullin; N: Number; SAPS II: Simplified Acute Physiological II score

**Table S8. APACHE II and MR-proADM disease severity groups for 28 day mortality**

|                           |                                                                          | APACHE II severity groups                                |                                                                       |                                                           |
|---------------------------|--------------------------------------------------------------------------|----------------------------------------------------------|-----------------------------------------------------------------------|-----------------------------------------------------------|
| MR-proADM severity groups |                                                                          | Low severity<br>(≤19 points)<br>N = 287, 11.5% mortality | Intermediate severity<br>(≥20 points ≤32)<br>N = 591, 30.3% mortality | High severity<br>(≥33 points)<br>N = 152, 41.4% mortality |
|                           | Low severity<br>(≤2.7 nmol/L)<br>N = 271, 10.3% mortality                | N = 122 (45.0%)<br>7.4% mortality                        | N = 137 (50.6%)<br>10.9% mortality                                    | N = 12 (4.4%)<br>33.3% mortality                          |
|                           | Intermediate severity<br>(>2.7 nmol/L ≤10.9)<br>N = 594, 26.4% mortality | N = 154 (25.9%)<br>12.3% mortality                       | N = 356 (59.9%)<br>30.1% mortality                                    | N = 84 (14.1%)<br>36.9% mortality                         |
|                           | High severity<br>(>10.9 nmol/L)<br>N = 165, 54.5% mortality              | N = 11 (6.7%)<br>45.5% mortality                         | N = 98 (59.4%)<br>58.2% mortality                                     | N = 56 (33.9%)<br>50.0% mortality                         |

APACHE II: Acute Physiological and Chronic Health Evaluation II score; MR-proADM: Mid-regional proadrenomedullin; N: Number



**Table S9. Lactate and MR-proADM disease severity groups for 28 day mortality**

| MR-proADM severity groups | Lactate severity groups                                                  |                                                           |                                                                         |                                                            |
|---------------------------|--------------------------------------------------------------------------|-----------------------------------------------------------|-------------------------------------------------------------------------|------------------------------------------------------------|
|                           |                                                                          | Low severity<br>(≤1.4 mmol/L)<br>N = 196, 15.8% mortality | Intermediate severity<br>(>1.4 mmol/L ≤6.4)<br>N = 668, 24.1% mortality | High severity<br>(>6.4 mmol/L)<br>N = 158, 52.5% mortality |
|                           | Low severity<br>(≤2.7 nmol/L)<br>N = 267, 10.5% mortality                | N = 99 (37.1%)<br>8.1% mortality                          | N = 154 (57.7%)<br>9.1% mortality                                       | N = 14 (5.2%)<br>42.9% mortality                           |
|                           | Intermediate severity<br>(>2.7 nmol/L ≤10.9)<br>N = 591, 26.6% mortality | N = 90 (15.2%)<br>21.1% mortality                         | N = 421 (71.2%)<br>25.2% mortality                                      | N = 80 (13.5%)<br>40.0% mortality                          |
|                           | High severity<br>(>10.9 nmol/L)<br>N = 164, 54.9% mortality              | N = 7 (4.3%)<br>57.1% mortality                           | N = 93 (56.7%)<br>44.1% mortality                                       | N = 64 (39.0%)<br>70.3% mortality                          |

MR-proADM: Mid-regional proadrenomedullin; N: Number

**Table S10. Biomarker and SOFA association with 28 day mortality at days 1, 4, 7 and 10**

|        | Biomarker or clinical score | Patients (N) | Mortality (N) | AUROC | Univariate Cox regression |         |                 |         | Multivariate Cox regression |         |                 |         |
|--------|-----------------------------|--------------|---------------|-------|---------------------------|---------|-----------------|---------|-----------------------------|---------|-----------------|---------|
|        |                             |              |               |       | LR $\chi^2$               | C-index | HR IQR [95% CI] | p-value | LR $\chi^2$                 | C-index | HR IQR [95% CI] | p-value |
| Day 1  | MR-proADM                   | 993          | 242           | 0.76  | 152.5                     | 0.73    | 3.3 [2.8 - 4.0] | <0.001  | 173.2                       | 0.74    | 3.2 [2.6 - 4.0] | <0.001  |
|        | PCT                         | 993          | 242           | 0.59  | 23.1                      | 0.59    | 1.6 [1.3 - 2.0] | <0.001  | 74.6                        | 0.65    | 1.6 [1.3 - 2.0] | <0.001  |
|        | CRP                         | 919          | 226           | 0.54  | 6.2                       | 0.54    | 0.9 [0.8 - 1.0] | 0.013   | 61.2                        | 0.65    | 0.9 [0.8 - 1.0] | <0.001  |
|        | Lactate                     | 1041         | 265           | 0.73  | 206.4                     | 0.72    | 2.4 [2.2 - 2.7] | <0.001  | 253.9                       | 0.75    | 2.5 [2.2 - 2.8] | <0.001  |
|        | SOFA                        | 1011         | 260           | 0.74  | 143.8                     | 0.72    | 2.5 [2.2 - 2.9] | <0.001  | 192.8                       | 0.75    | 2.6 [2.2 - 3.0] | <0.001  |
| Day 4  | MR-proADM                   | 777          | 158           | 0.76  | 100.5                     | 0.73    | 3.2 [2.5 - 4.0] | <0.001  | 123.7                       | 0.75    | 3.0 [2.3 - 3.8] | <0.001  |
|        | PCT                         | 777          | 158           | 0.62  | 22.6                      | 0.61    | 1.7 [1.4 - 2.1] | <0.001  | 69.3                        | 0.68    | 1.8 [1.4 - 2.2] | <0.001  |
|        | CRP                         | 708          | 146           | 0.48  | 0.7                       | 0.52    | 1.1 [0.9 - 1.3] | 0.393   | 45.8                        | 0.65    | 1.1 [0.9 - 1.4] | <0.001  |
|        | Lactate                     | 803          | 166           | 0.69  | 60.6                      | 0.68    | 1.8 [1.6 - 2.0] | <0.001  | 100.9                       | 0.71    | 1.7 [1.5 - 2.0] | <0.001  |
|        | SOFA                        | 767          | 162           | 0.75  | 111.5                     | 0.72    | 3.0 [2.4 - 3.6] | <0.001  | 155.9                       | 0.76    | 3.1 [2.5 - 3.8] | <0.001  |
| Day 7  | MR-proADM                   | 630          | 127           | 0.78  | 93.7                      | 0.76    | 3.4 [2.6 - 4.3] | <0.001  | 117.8                       | 0.76    | 3.3 [2.5 - 4.3] | <0.001  |
|        | PCT                         | 631          | 128           | 0.72  | 62.3                      | 0.70    | 2.6 [2.1 - 3.3] | <0.001  | 101.6                       | 0.74    | 2.7 [2.1 - 3.4] | <0.001  |
|        | CRP                         | 583          | 121           | 0.56  | 3.5                       | 0.55    | 1.3 [1.0 - 1.6] | 0.061   | 47.1                        | 0.67    | 1.3 [1.0 - 1.7] | <0.001  |
|        | Lactate                     | 658          | 138           | 0.68  | 69.4                      | 0.68    | 2.0 [1.7 - 2.3] | <0.001  | 112.2                       | 0.73    | 2.0 [1.7 - 2.4] | <0.001  |
|        | SOFA                        | 617          | 128           | 0.75  | 107.7                     | 0.73    | 2.7 [2.3 - 3.3] | <0.001  | 140.2                       | 0.77    | 2.8 [2.3 - 3.4] | <0.001  |
| Day 10 | MR-proADM                   | 503          | 82            | 0.78  | 72.6                      | 0.76    | 4.3 [3.0 - 6.1] | <0.001  | 90.9                        | 0.78    | 3.8 [2.6 - 5.5] | <0.001  |
|        | PCT                         | 503          | 82            | 0.75  | 52.0                      | 0.74    | 2.8 [2.2 - 3.7] | <0.001  | 90.4                        | 0.78    | 3.1 [2.3 - 4.2] | <0.001  |
|        | CRP                         | 457          | 80            | 0.61  | 10.0                      | 0.60    | 1.6 [1.2 - 2.2] | <0.001  | 51.2                        | 0.71    | 1.8 [1.3 - 2.6] | <0.001  |
|        | Lactate                     | 516          | 88            | 0.61  | 19.8                      | 0.61    | 1.6 [1.3 - 2.0] | <0.001  | 54.7                        | 0.70    | 1.6 [1.3 - 2.0] | <0.001  |
|        | SOFA                        | 490          | 84            | 0.76  | 85.8                      | 0.75    | 3.3 [2.6 - 4.3] | <0.001  | 107.8                       | 0.78    | 3.1 [2.4 - 4.1] | <0.001  |

APACHE II: Acute Physiological and Chronic Health Evaluation II score; CI: Confidence Interval; CRP: C-reactive protein; HR: Hazard Ratio; IQR: Interquartile range; MR-proADM: Mid-regional proadrenomedullin; N: Number; PCT: Procalcitonin; SAPS II: Simplified Acute Physiological II score; SOFA: Sequential Organ Failure Assessment score

**Table S11. Disease severity groups and corresponding mortality rates throughout ICU treatment**

|        | Biomarker or clinical score | Low severity patient population |                  |                 |             |             | High severity patient population |                  |                 |             |             |
|--------|-----------------------------|---------------------------------|------------------|-----------------|-------------|-------------|----------------------------------|------------------|-----------------|-------------|-------------|
|        |                             | Patients (N)                    | Mortality (N, %) | Optimal cut-off | Sensitivity | Specificity | Patients (N)                     | Mortality (N, %) | Optimal cut-off | Sensitivity | Specificity |
| Day 1  | MR-proADM                   | 304                             | 24 (7.9%)        | 2.80            | 0.90        | 0.37        | 162                              | 87 (53.7%)       | 9.5             | 0.36        | 0.90        |
|        | PCT                         | 203                             | 25 (12.3%)       | 1.02            | 0.90        | 0.24        | 115                              | 40 (34.8%)       | 47.6            | 0.17        | 0.90        |
|        | CRP                         | 101                             | 32 (31.7%)       | 99              | 0.90        | 0.14        | 88                               | 18 (4.8%)        | 373             | 0.08        | 0.90        |
|        | Lactate                     | 310                             | 33 (10.6%)       | 1.22            | 0.88        | 0.36        | 185                              | 109 (58.9%)      | 3.5             | 0.43        | 0.89        |
|        | SOFA                        | 435                             | 49 (11.3%)       | 8.0             | 0.88        | 0.40        | 165                              | 87 (52.7%)       | 14              | 0.33        | 0.90        |
| Day 4  | MR-proADM                   | 290                             | 16 (5.5%)        | 2.25            | 0.90        | 0.44        | 120                              | 58 (48.3%)       | 7.7             | 0.37        | 0.90        |
|        | PCT                         | 147                             | 16 (10.9%)       | 0.33            | 0.90        | 0.21        | 87                               | 25 (28.7%)       | 14.08           | 0.16        | 0.90        |
|        | CRP                         | 65                              | 9 (13.8%)        | 32.7            | 0.90        | 0.06        | 51                               | 15 (29.4%)       | 276.5           | 0.06        | 0.90        |
|        | Lactate                     | 124                             | 15 (12.1%)       | 0.89            | 0.91        | 0.17        | 136                              | 65 (47.8%)       | 2.15            | 0.39        | 0.89        |
|        | SOFA                        | 213                             | 15 (7.0%)        | 5.5             | 0.91        | 0.33        | 137                              | 67 (48.9%)       | 12.75           | 0.41        | 0.88        |
| Day 7  | MR-proADM                   | 252                             | 14 (5.6%)        | 2.25            | 0.89        | 0.47        | 104                              | 54 (51.9%)       | 6.95            | 0.43        | 0.90        |
|        | PCT                         | 184                             | 14 (7.6%)        | 0.31            | 0.89        | 0.34        | 85                               | 35 (41.2%)       | 4.67            | 0.27        | 0.90        |
|        | CRP                         | 62                              | 12 (19.4%)       | 27.4            | 0.90        | 0.11        | 69                               | 23 (37.7%)       | 207             | 0.19        | 0.90        |
|        | Lactate                     | 104                             | 15 (14.4%)       | 0.84            | 0.89        | 0.17        | 102                              | 51 (50.0%)       | 2.10            | 0.37        | 0.90        |
|        | SOFA                        | 207                             | 16 (7.7%)        | 5.5             | 0.88        | 0.39        | 91                               | 48 (52.7%)       | 12.5            | 0.38        | 0.91        |
| Day 10 | MR-proADM                   | 213                             | 8 (3.8%)         | 2.25            | 0.90        | 0.49        | 78                               | 35 (44.9%)       | 7.45            | 0.43        | 0.90        |
|        | PCT                         | 177                             | 9 (5.1%)         | 0.30            | 0.89        | 0.40        | 74                               | 32 (43.2%)       | 2.845           | 0.39        | 0.90        |
|        | CRP                         | 69                              | 8 (11.6%)        | 32.1            | 0.90        | 0.16        | 52                               | 14 (26.9%)       | 204             | 0.18        | 0.90        |
|        | Lactate                     | 47                              | 7 (14.9%)        | 0.68            | 0.92        | 0.09        | 65                               | 24 (36.9%)       | 2.15            | 0.27        | 0.90        |
|        | SOFA                        | 116                             | 9 (7.8%)         | 4.5             | 0.89        | 0.26        | 85                               | 42 (49.4%)       | 11.5            | 0.50        | 0.89        |

CRP: C-reactive protein; MR-proADM: Mid-regional proadrenomedullin; N: Number; PCT: Procalcitonin; SOFA: Sequential Organ Failure Assessment score

**Table S12. Characteristics of low severity MR-proADM cut-offs at days 1, 4, 7 and 10**

| Time point | MR-proADM cut-off (nmol/L) | Sensitivity        | Specificity        | PPV                | NPV                | LR+                | LR-                |
|------------|----------------------------|--------------------|--------------------|--------------------|--------------------|--------------------|--------------------|
| Day 1      | 2.80                       | 0.90 [0.86 - 0.93] | 0.37 [0.34 - 0.41] | 0.32 [0.28 - 0.35] | 0.92 [0.89 - 0.95] | 1.44 [1.34 - 1.54] | 0.26 [0.18 - 0.39] |
| Day 4      | 2.25                       | 0.90 [0.84 - 0.94] | 0.44 [0.40 - 0.48] | 0.29 [0.25 - 0.33] | 0.94 [0.91 - 0.97] | 1.61 [1.48 - 1.76] | 0.23 [0.14 - 0.37] |
| Day 7      | 2.25                       | 0.89 [0.82 - 0.93] | 0.47 [0.43 - 0.52] | 0.30 [0.26 - 0.35] | 0.94 [0.91 - 0.97] | 1.69 [1.52 - 1.87] | 0.23 [0.14 - 0.39] |
| Day 10     | 2.25                       | 0.90 [0.82 - 0.95] | 0.49 [0.44 - 0.53] | 0.26 [0.21 - 0.31] | 0.96 [0.93 - 0.98] | 1.76 [1.56 - 1.98] | 0.20 [0.10 - 0.39] |

LR+: Positive likelihood ratio; LR-: Negative likelihood ratio; MR-proADM: Mid-regional proadrenomedullin; NPV: Negative predictive value; PPV: Positive predictive value

**Table S13. 28 day mortality relative risk ratios for continuously maintained biomarker and score values**

| Ventile (%) | MR-proADM cut-off (nmol/L) | MR-proADM Relative Risk Ratio [95% CI] | MR-proADM $\chi^2$ test p-value | PCT cut-off (ng/mL) | PCT Relative Risk Ratio [95% CI] | PCT $\chi^2$ test p-value | Lactate cut-off (mmol/L) | Lactate Relative Risk Ratio [95% CI] | Lactate $\chi^2$ test p-value | SOFA cut-off (points) | SOFA Relative Risk Ratio [95% CI] | SOFA $\chi^2$ test p-value |
|-------------|----------------------------|----------------------------------------|---------------------------------|---------------------|----------------------------------|---------------------------|--------------------------|--------------------------------------|-------------------------------|-----------------------|-----------------------------------|----------------------------|
| 5           | 1.3                        | 6.03 [3.52 - 10.32]                    | <0.001                          | 0.25                | 3.44 [2.35 - 5.02]               | <0.001                    | 1.0                      | 3.15 [2.45 - 4.05]                   | <0.001                        | 5                     | 4.99 [3.66 - 6.82]                | <0.001                     |
| 10          | 1.6                        | 5.57 [3.60 - 8.60]                     | <0.001                          | 0.43                | 3.05 [2.30 - 4.06]               | <0.001                    | 1.1                      | 3.34 [2.64 - 4.22]                   | <0.001                        | 6                     | 4.70 [3.64 - 6.09]                | <0.001                     |
| 15          | 2                          | 5.88 [4.11 - 8.41]                     | <0.001                          | 0.78                | 3.12 [2.45 - 3.97]               | <0.001                    | 1.3                      | 3.53 [2.88 - 4.33]                   | <0.001                        | 7                     | 4.24 [3.40 - 5.28]                | <0.001                     |
| 20          | 2.3                        | 4.64 [3.45 - 6.22]                     | <0.001                          | 1.20                | 3.00 [2.41 - 3.74]               | <0.001                    | 1.5                      | 3.89 [3.22 - 4.70]                   | <0.001                        | 7                     | 4.24 [3.40 - 5.28]                | <0.001                     |
| 25          | 2.6                        | 4.59 [3.49 - 6.03]                     | <0.001                          | 1.59                | 3.05 [2.47 - 3.75]               | <0.001                    | 1.6                      | 3.63 [3.04 - 4.35]                   | <0.001                        | 8                     | 3.92 [3.22 - 4.77]                | <0.001                     |
| 30          | 3                          | 4.61 [3.60 - 5.92]                     | <0.001                          | 2.30                | 2.66 [2.19 - 3.23]               | <0.001                    | 1.8                      | 3.83 [3.23 - 4.53]                   | <0.001                        | 8                     | 3.92 [3.22 - 4.77]                | <0.001                     |
| 35          | 3.4                        | 4.27 [3.41 - 5.34]                     | <0.001                          | 3.16                | 2.60 [2.16 - 3.14]               | <0.001                    | 2.0                      | 3.89 [3.30 - 4.60]                   | <0.001                        | 9                     | 3.64 [3.05 - 4.35]                | <0.001                     |
| 40          | 3.9                        | 4.32 [3.50 - 5.33]                     | <0.001                          | 4.28                | 2.48 [2.06 - 2.99]               | <0.001                    | 2.2                      | 4.35 [3.72 - 5.08]                   | <0.001                        | 9                     | 3.64 [3.05 - 4.35]                | <0.001                     |
| 45          | 4.4                        | 4.18 [3.43 - 5.10]                     | <0.001                          | 4.53                | 2.48 [2.07 - 2.99]               | <0.001                    | 2.4                      | 4.59 [3.96 - 5.33]                   | <0.001                        | 9                     | 3.64 [3.05 - 4.35]                | <0.001                     |
| 50          | 4.9                        | 4.14 [3.42 - 5.01]                     | <0.001                          | 7.37                | 2.42 [2.01 - 2.92]               | <0.001                    | 2.7                      | 4.58 [3.97 - 5.28]                   | <0.001                        | 10                    | 3.45 [2.91 - 4.08]                | <0.001                     |
| 55          | 5.5                        | 3.89 [3.24 - 4.67]                     | <0.001                          | 9.22                | 2.38 [1.97 - 2.87]               | <0.001                    | 2.9                      | 4.58 [3.98 - 5.27]                   | <0.001                        | 10                    | 3.45 [2.91 - 4.08]                | <0.001                     |
| 60          | 6.2                        | 3.62 [3.03 - 4.32]                     | <0.001                          | 11.24               | 2.22 [1.83 - 2.69]               | <0.001                    | 3.2                      | 4.39 [3.82 - 5.05]                   | <0.001                        | 10                    | 3.45 [2.91 - 4.08]                | <0.001                     |
| 65          | 7.0                        | 3.51 [2.96 - 4.17]                     | <0.001                          | 14.71               | 2.17 [1.78 - 2.66]               | <0.001                    | 3.7                      | 4.18 [3.64 - 4.81]                   | <0.001                        | 11                    | 3.22 [2.72 - 3.81]                | <0.001                     |
| 70          | 7.8                        | 3.12 [2.62 - 3.71]                     | <0.001                          | 18.83               | 2.06 [1.66 - 2.55]               | <0.001                    | 4.0                      | 4.09 [3.56 - 4.69]                   | <0.001                        | 11                    | 3.22 [2.72 - 3.81]                | <0.001                     |
| 75          | 8.8                        | 3.03 [2.55 - 3.61]                     | <0.001                          | 26.77               | 2.14 [1.71 - 2.66]               | <0.001                    | 4.7                      | 4.01 [3.50 - 4.60]                   | <0.001                        | 12                    | 2.97 [2.48 - 3.56]                | <0.001                     |
| 80          | 9.6                        | 2.81 [2.34 - 3.38]                     | <0.001                          | 37.96               | 2.06 [1.61 - 2.62]               | <0.001                    | 5.4                      | 3.77 [3.26 - 4.36]                   | <0.001                        | 13                    | 2.95 [2.45 - 3.56]                | <0.001                     |
| 85          | 11.3                       | 2.68 [2.19 - 3.27]                     | <0.001                          | 46.27               | 2.05 [1.60 - 2.63]               | <0.001                    | 6.6                      | 3.83 [3.33 - 4.40]                   | <0.001                        | 13                    | 2.95 [2.45 - 3.56]                | <0.001                     |
| 90          | 14.1                       | 2.48 [1.98 - 3.10]                     | <0.001                          | 59.12               | 1.96 [1.49 - 2.58]               | <0.001                    | 7.9                      | 3.72 [3.22 - 4.30]                   | <0.001                        | 15                    | 2.77 [2.24 - 3.43]                | <0.001                     |
| 95          | 17.5                       | 2.03 [1.51 - 2.73]                     | <0.001                          | 97.21               | 1.77 [1.29 - 2.44]               | 0.002                     | 11.4                     | 3.64 [3.11 - 4.25]                   | <0.001                        | 16                    | 2.40 [1.81 - 3.19]                | <0.001                     |

Ascending biomarker and SOFA values were grouped into ventiles (increments of 5%) for all patients, based on respective concentrations or values at baseline. Corresponding cut-offs for each ventile were subsequently identified. 28 day mortality prediction was assessed depending on whether the concentration of each biomarker or score was continuously maintained above respective ventiles from baseline to day 10. Relative risk ratios were calculated for each ventile in order to identify the ratio of the risk in the exposed population (i.e. where biomarkers or scores were continuously maintained above the corresponding ventile) compared to that of the non-exposed population (i.e. where biomarkers or scores were below the respective ventile at one time point or more). The  $\chi^2$  test was subsequently performed to determine the significance of any difference between the the two populations.

*MR-proADM*: Mid-regional proadrenomedullin; *PCT*: Procalcitonin; *SOFA*: Sequential Organ Failure Assessment score

**Table S14. 7 day, ICU and Hospital mortality rates following PCT and MR-proADM kinetics between baseline and day 1**

|                          | Biomarker kinetics |              | 7 day mortality |                   |                      | ICU mortality |                   |                        | Hospital mortality |                   |                       |
|--------------------------|--------------------|--------------|-----------------|-------------------|----------------------|---------------|-------------------|------------------------|--------------------|-------------------|-----------------------|
|                          | Baseline           | Day 1        | N               | %                 | HR [95% CI]          | N             | %                 | HR [95% CI]            | N                  | %                 | HR [95% CI]           |
| PCT decrease ≥20%        |                    |              | 461             | 6.1%              |                      | 456           | 16.7%             |                        | 439                | 24.1%             |                       |
| MR-proADM severity level | Low                | Low          | 126             | 2.4%              | 1.9 [0.5 - 6.9]*     | 126           | 4.8%              | 3.9 [1.6 - 9.6]*       | 123                | 7.3%              | 4.9 [2.3 - 10.3]*     |
|                          | Intermediate       | Intermediate | 205             | 4.4%              | 8.2 [3.4 - 21.2]**   | 202           | 16.3%             | 8.7 [3.7 - 20.7]**     | 194                | 27.8%             | 6.2 [2.5 - 14.9]**    |
|                          | High               | High         | 27              | 29.6%             | 15.2 [4.0 - 57.3]*** | 27            | 63.0%             | 34.0 [11.0 - 105.5]*** | 27                 | 70.4%             | 30.1 [10.3 - 87.6]*** |
|                          | Increasing         |              |                 |                   |                      |               |                   |                        |                    |                   |                       |
|                          | Low                | Intermediate | 3               | 0.0%              | -                    | 2             | 0.0%              | -                      | 2                  | 0.0%              | -                     |
|                          | Intermediate       | High         | 10              | 20.0%             | 4.7 [1.0 - 21.6]††   | 10            | 30.0%             | 2.2 [0.5 - 8.9]††      | 10                 | 50.0%             | 2.6 [0.7 - 9.3]††     |
|                          | Decreasing         |              |                 |                   |                      |               |                   |                        |                    |                   |                       |
|                          | High               | Intermediate | 30              | 16.7%             | 0.5 [0.2 - 1.6]‡     | 29            | 37.9%             | 0.4 [0.1 - 1.1]‡       | 28                 | 46.4%             | 0.4 [0.1 - 1.1]‡      |
| Intermediate             | Low                | 60           | 1.7%            | 0.4 [0.0 - 3.0]‡‡ | 59                   | 10.2%         | 0.6 [0.1 - 1.5]‡‡ | 55                     | 10.9%              | 0.3 [0.1 - 0.8]‡‡ |                       |
| PCT decrease <20%        |                    |              | 526             | 13.7%             |                      | 517           | 30.2%             |                        | 493                | 36.9%             |                       |
| MR-proADM severity level | Low                | Low          | 107             | 5.6%              | 2.0 [0.8 - 4.9]*     | 107           | 10.3%             | 3.4 [1.7 - 6.8]*       | 102                | 13.7%             | 3.6 [1.9 - 6.8]*      |
|                          | Intermediate       | Intermediate | 230             | 10.9%             | 2.6 [1.5 - 4.7]**    | 225           | 28.0%             | 3.0 [1.8 - 5.2]**      | 216                | 36.6%             | 2.4 [1.4 - 4.2]**     |
|                          | High               | High         | 77              | 26.0%             | 5.3 [2.1 - 13.2]***  | 74            | 54.1%             | 10.3 [4.7 - 22.3]***   | 72                 | 58.3%             | 8.8 [4.2 - 18.3]***   |
|                          | Increasing         |              |                 |                   |                      |               |                   |                        |                    |                   |                       |
|                          | Low                | Intermediate | 30              | 13.3%             | 2.5 [0.7 - 8.9]†     | 29            | 31.0%             | 3.9 [1.4 - 10.7]†      | 27                 | 37.0%             | 3.7 [1.4 - 9.7]†      |
|                          | Intermediate       | High         | 46              | 28.3%             | 3.0 [1.5 - 5.8]††    | 45            | 57.8%             | 3.3 [1.7 - 6.4]††      | 43                 | 65.1%             | 3.2 [1.6 - 6.4]††     |
|                          | Decreasing         |              |                 |                   |                      |               |                   |                        |                    |                   |                       |
|                          | High               | Intermediate | 11              | 36.6%             | 0.5 [0.2 - 1.6]‡     | 11            | 54.5%             | 1.0 [0.3 - 3.7]‡       | 10                 | 80.0%             | -                     |
| High                     | Low                | 1            | 0.0%            | -                 | 1                    | 0.0%          | -                 | 1                      | 0.0%               | -                 |                       |
| Intermediate             | Low                | 24           | 0.0%            | 0.1 [0.0 - 0.6]‡‡ | 24                   | 4.2%          | 0.1 [0.0 - 0.8]‡‡ | 22                     | 4.5%               | 0.1 [0.0 - 0.6]‡‡ |                       |

Hazard ratios for patients with: \* continuously intermediate vs. low values; \*\* continuously high vs. intermediate values; \*\*\* continuously high vs. low values; † increasing low to intermediate vs. continuously low values; †† increasing intermediate to high vs. continuously intermediate values; ‡ decreasing high to intermediate vs. continuously high values; ‡‡ decreasing intermediate to low vs. continuously intermediate values.

CI: Confidence Interval; HR: Hazard Ratio; IQR: Interquartile range; MR-proADM: Mid-regional proadrenomedullin; N: Number; PCT: Procalcitonin

**Table S15. ICU and Hospital mortality rates following PCT and MR-proADM kinetics between baseline and day 4**

|                          | Biomarker kinetics |              | ICU mortality |       |                        | Hospital mortality |       |                        |
|--------------------------|--------------------|--------------|---------------|-------|------------------------|--------------------|-------|------------------------|
|                          | Baseline           | Day 4        | N             | %     | HR [95% CI]            | N                  | %     | HR [95% CI]            |
| PCT decrease ≥50%        |                    |              | 555           | 16.8% |                        | 532                | 24.1% |                        |
| MR-proADM severity level | Low                | Low          | 114           | 2.6%  | 6.9 [2.1 - 23.1]*      | 109                | 2.8%  | 13.3 [4.1 - 43.8]*     |
|                          | Intermediate       | Intermediate | 208           | 15.9% | 8.1 [3.8 - 17.2]**     | 197                | 27.4% | 5.1 [2.4 - 10.7]**     |
|                          | High               | High         | 38            | 60.5% | 56.2 [15.0 - 210.2]*** | 38                 | 65.8% | 67.9 [18.0 - 256.6]*** |
|                          | Low                | Intermediate | 24            | 29.2% | 15.1 [3.6 - 64.1]†     | 24                 | 33.3% | 17.7 [4.2 - 73.6]†     |
|                          | Intermediate       | High         | 23            | 43.5% | 4.1 [1.7 - 10.0]††     | 23                 | 56.5% | 3.4 [1.4 - 8.3]††      |
|                          | High               | Intermediate | 41            | 22.0% | 0.2 [0.1 - 0.5]‡       | 39                 | 33.3% | 1.3 [0.6 - 2.7]‡       |
|                          | High               | Low          | 3             | 0.0%  | -                      | 2                  | 50.0% | -                      |
| PCT decrease <50%        |                    |              | 204           | 28.9% |                        | 194                | 30.4% |                        |
| MR-proADM severity level | Low                | Low          | 56            | 1.8%  | 28.1 [3.7 - 216.3]*    | 54                 | 7.4%  | 10.1 [3.3 - 31.2]*     |
|                          | Intermediate       | Intermediate | 68            | 33.8% | 1.8 [0.7 - 4.8]**      | 65                 | 44.6% | 1.9 [0.7 - 5.2]**      |
|                          | High               | High         | 21            | 47.6% | 50.0 [5.8 - 431.5]***  | 20                 | 60.0% | 18.8 [4.8 - 72.7]***   |
|                          | Low                | Intermediate | 16            | 43.7% | 42.8 [4.7 - 390.2]†    | 14                 | 57.1% | 16.7 [3.8 - 72.4]†     |
|                          | Low                | High         | 4             | 0.0%  | -                      | 4                  | 25.0% | -                      |
|                          | Intermediate       | High         | 29            | 58.6% | 2.8 [1.1 - 6.8]††      | 28                 | 64.3% | 2.2 [0.9 - 5.6]††      |
|                          | High               | Intermediate | -             | -     | -                      | -                  | -     | -                      |
|                          | High               | Low          | -             | -     | -                      | -                  | -     | -                      |
| Intermediate             | Low                | 10           | 10.0%         | -     | 9                      | 33.3%              | -     |                        |

Hazard ratios for patients with: \* continuously intermediate vs. low values; \*\* continuously high vs. intermediate values; \*\*\* continuously high vs. low values; † Increasing low to intermediate vs. continuously low values; †† Increasing intermediate to high vs. continuously intermediate values; ‡ decreasing high to intermediate vs. continuously high values; ‡‡ Decreasing intermediate to low vs. continuously intermediate values.

CI: Confidence Interval; HR: Hazard Ratio; IQR: Interquartile range; MR-proADM: Mid-regional proadrenomedullin; N: Number; PCT: Procalcitonin

**Table S16. Baseline biomarker and clinical score correlation with SOFA at baseline and SOFA at day 1**

| Baseline biomarkers and scores | Baseline SOFA |                      |         | Day 1 SOFA   |                      |         |
|--------------------------------|---------------|----------------------|---------|--------------|----------------------|---------|
|                                | Patients (N)  | Correlation [95% CI] | p-value | Patients (N) | Correlation [95% CI] | p-value |
| MR-proADM                      | 969           | 0.47 [0.41 - 0.51]   | <0.001  | 969          | 0.57 [0.52 - 0.61]   | <0.001  |
| PCT                            | 1007          | 0.23 [0.17 - 0.29]   | <0.001  | 969          | 0.22 [0.16 - 0.28]   | <0.001  |
| CRP                            | 918           | 0.06 [0.00 - 0.13]   | 0.006   | 885          | 0.04 [0.00 - 0.12]   | 0.271   |
| Lactate                        | 1044          | 0.33 [0.27 - 0.38]   | <0.001  | 1005         | 0.40 [0.35 - 0.45]   | <0.001  |
| SAPS II                        | 1051          | 0.60 [0.56 - 0.64]   | <0.001  | 1011         | 0.50 [0.45 - 0.54]   | <0.001  |
| APACHE II                      | 1051          | 0.62 [0.58 - 0.65]   | <0.001  | 1011         | 0.53 [0.48 - 0.57]   | <0.001  |

APACHE II: Acute Physiological and Chronic Health Evaluation II score; CI: Confidence Interval; CRP: C-reactive protein; HR: Hazard Ratio; IQR: Interquartile range; MR-proADM: Mid-regional proadrenomedullin; N: Number; PCT: Procalcitonin; SAPS II: Simplified Acute Physiological II score; SOFA: Sequential Organ Failure Assessment score

**Table S17. Baseline MR-proADM correlations with SOFA subscores at baseline and on day 1**

| SOFA subscore | Baseline SOFA |                      |         | Day 1 SOFA   |                      |         |
|---------------|---------------|----------------------|---------|--------------|----------------------|---------|
|               | Patients (N)  | Correlation [95% CI] | p-value | Patients (N) | Correlation [95% CI] | p-value |
| Circulation   | 1022          | 0.18 [0.12 - 0.23]   | <0.001  | 995          | 0.23 [0.17 - 0.29]   | <0.001  |
| Pulmonary     | 1025          | 0.12 [0.06 - 0.18]   | <0.001  | 994          | 0.15 [0.09 - 0.21]   | <0.001  |
| Coagulation   | 1028          | 0.30 [0.25 - 0.36]   | <0.001  | 1002         | 0.40 [0.35 - 0.45]   | <0.001  |
| Renal         | 1030          | 0.50 [0.45 - 0.54]   | <0.001  | 1001         | 0.62 [0.58 - 0.66]   | <0.001  |
| Liver         | 1014          | 0.20 [0.14 - 0.26]   | <0.001  | 993          | 0.36 [0.30 - 0.40]   | <0.001  |
| CNS           | 1030          | 0.03 [-0.03 - 0.09]  | 0.386   | 1003         | 0.08 [0.02 - 0.14]   | 0.009   |

CI: Confidence Interval; N: Number; SOFA: Sequential Organ Failure Assessment score

**Table S18. Biomarker correlations with SOFA scores throughout ICU treatment**

|        |                      | MR-proADM          | PCT                 | CRP                  | Lactate            |
|--------|----------------------|--------------------|---------------------|----------------------|--------------------|
| Day 1  | Patients (N)         | 960                | 960                 | 894                  | 1008               |
|        | Correlation [95% CI] | 0.51 [0.46 - 0.55] | 0.24 [0.18 - 0.30]  | -0.04 [-0.10 - 0.03] | 0.48 [0.43 - 0.53] |
|        | p-value              | <0.001             | <0.001              | <0.001               | <0.001             |
| Day 4  | Patients (N)         | 729                | 729                 | 667                  | 754                |
|        | Correlation [95% CI] | 0.58 [0.53 - 0.63] | 0.13 [0.06 - 0.20]  | 0.14 [0.06 - 0.21]   | 0.36 [0.29 - 0.42] |
|        | p-value              | <0.001             | <0.001              | <0.001               | <0.001             |
| Day 7  | Patients (N)         | 580                | 581                 | 547                  | 612                |
|        | Correlation [95% CI] | 0.58 [0.53 - 0.64] | 0.05 [-0.03 - 0.13] | 0.15 [0.07 - 0.23]   | 0.43 [0.37 - 0.50] |
|        | p-value              | <0.001             | 0.237               | <0.001               | <0.001             |
| Day 10 | Patients (N)         | 473                | 473                 | 429                  | 483                |
|        | Correlation [95% CI] | 0.65 [0.59 - 0.70] | 0.28 [0.20 - 0.37]  | 0.13 [0.03 - 0.22]   | 0.34 [0.26 - 0.42] |
|        | p-value              | <0.001             | <0.001              | 0.008                | <0.001             |

CI: Confidence Interval; CRP: C-reactive protein; N: Number; MR-proADM: Mid-regional proadrenomedullin; PCT: Procalcitonin; SOFA: Sequential Organ Failure Assessment score

**Table S19. Time dependent Cox regressions for single and cumulative additions of MR-proADM**

| Addition of subsequent single day measurements to baseline values            | Bivariate model |    |                   |          |         | Multivariate model |    |                   |          |         |
|------------------------------------------------------------------------------|-----------------|----|-------------------|----------|---------|--------------------|----|-------------------|----------|---------|
|                                                                              | LR $\chi^2$     | DF | Added LR $\chi^2$ | Added DF | p-value | LR $\chi^2$        | DF | Added LR $\chi^2$ | Added DF | p-value |
| MR-proADM baseline                                                           | 144.2           | 1  | Reference         |          |         | 163.0              | 10 | Reference         |          |         |
| + Day 1 measurement                                                          | 169.8           | 2  | 25.6              | 1        | <0.001  | 190.6              | 11 | 27.6              | 1        | <0.001  |
| + Day 4 measurement                                                          | 161.9           | 2  | 17.7              | 1        | <0.001  | 180.4              | 11 | 17.4              | 1        | <0.001  |
| + Day 7 measurement                                                          | 175.7           | 2  | 31.5              | 1        | <0.001  | 195.1              | 11 | 32.1              | 1        | <0.001  |
| + Day 10 measurement                                                         | 179.8           | 2  | 35.6              | 1        | <0.001  | 197.9              | 11 | 34.9              | 1        | <0.001  |
| <b>Addition of subsequent cumulative day measurements to baseline values</b> |                 |    |                   |          |         |                    |    |                   |          |         |
| MR-proADM baseline                                                           | 144.2           | 1  | Reference         |          |         | 163.0              | 10 | Reference         |          |         |
| + Day 1                                                                      | 169.8           | 2  | 25.6              | 1        | <0.001  | 190.6              | 11 | 27.6              | 1        | <0.001  |
| + Day 1 + Day 4                                                              | 174.9           | 3  | 5.1               | 1        | 0.024   | 195.4              | 12 | 4.8               | 1        | 0.028   |
| + Day 1 + Day 4 + Day 7                                                      | 188.7           | 4  | 13.9              | 1        | <0.001  | 210.4              | 13 | 15.0              | 1        | <0.001  |
| + Day 1 + Day 4 + Day 7 + Day 10                                             | 195.2           | 5  | 6.5               | 1        | 0.011   | 216.6              | 14 | 6.2               | 1        | 0.013   |

DF: Degrees of Freedom; MR-proADM: Mid-regional proadrenomedullin

### 3. Supplementary Figures

**Figure S1. 28 and 90 day mortality rates following PCT and MR-proADM kinetics between baseline and day 4**

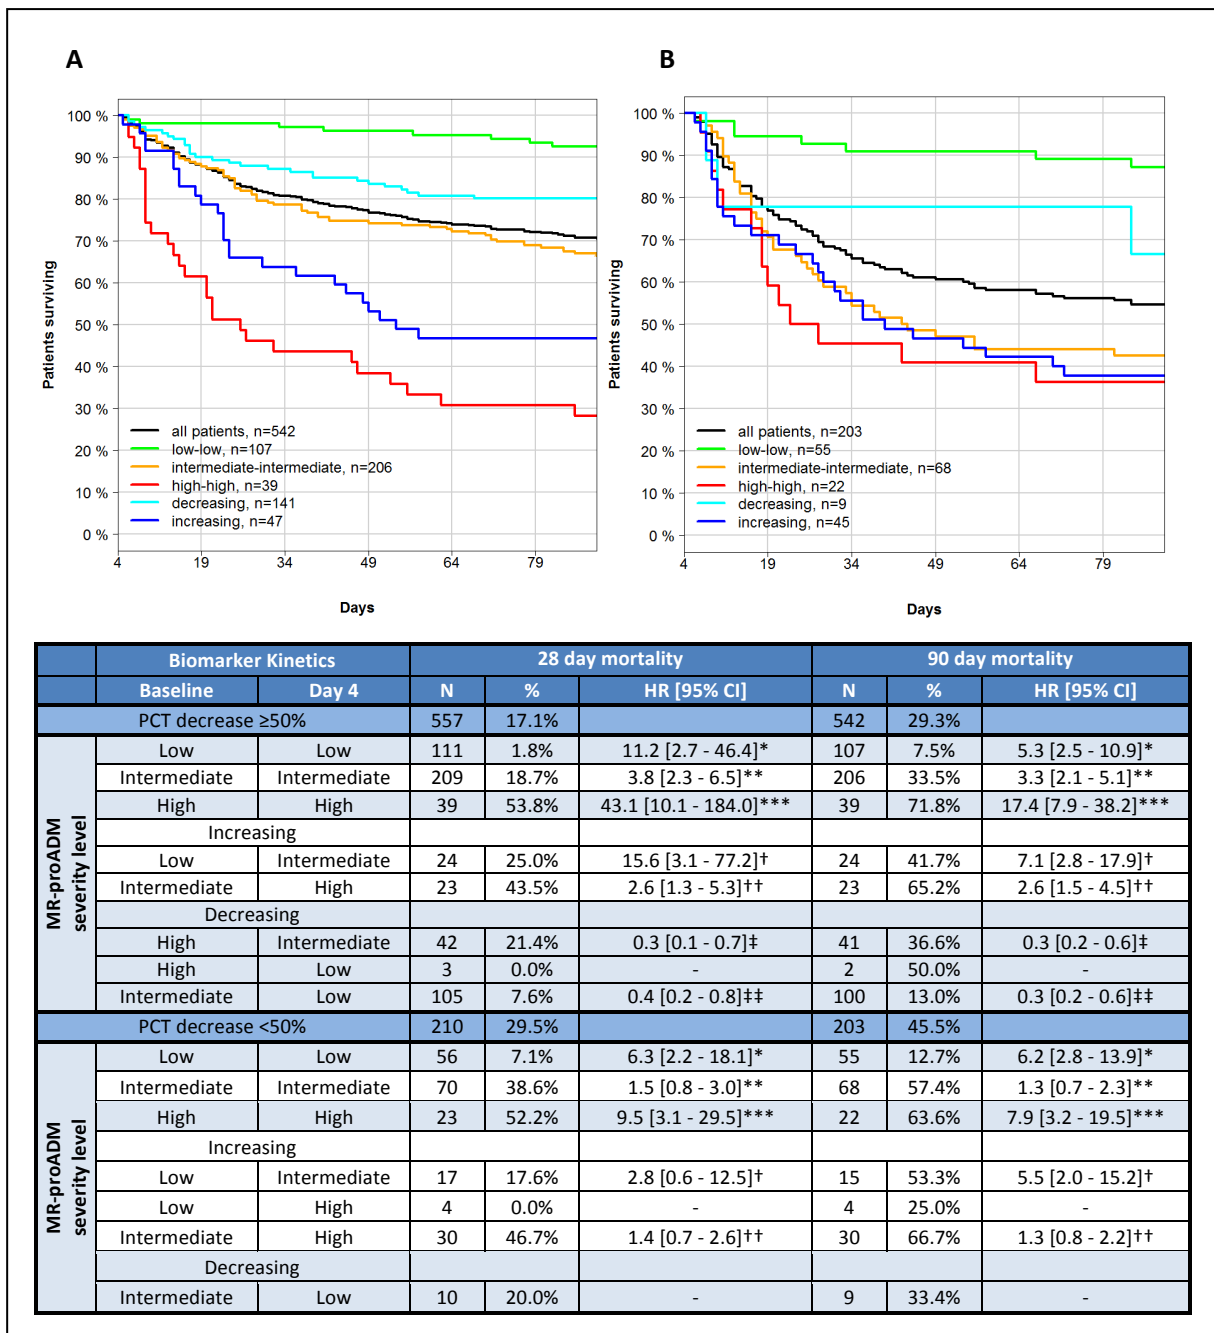

Kaplan-Meier plots illustrate patient subgroups stratified by MR-proADM severity levels for 90 day mortality, based on corresponding PCT concentrations from baseline to day 4, either decreasing by (A) ≥50%, or (B) <50%. Severity levels are grouped either as continuously low, intermediate or high, or as a composite for increasing or decreasing levels. Individual Hazard ratios for comparisons between patient subgroups are indicated by: \* continuously intermediate vs. low values; \*\* continuously high vs. intermediate values; \*\*\* continuously high vs. low values; † Increasing low to intermediate vs. continuously low values; †† Increasing intermediate to high vs. continuously intermediate values; ‡ decreasing high to intermediate vs. continuously high values; ‡‡ Decreasing intermediate to low vs. continuously intermediate values.

CI: Confidence Interval; HR: Hazard Ratio; IQR: Interquartile range; MR-proADM: Mid-regional proadrenomedullin; N: Number; PCT: Procalcitonin

**Figure S2. Influence of infectious origin on 28 day mortality prediction**

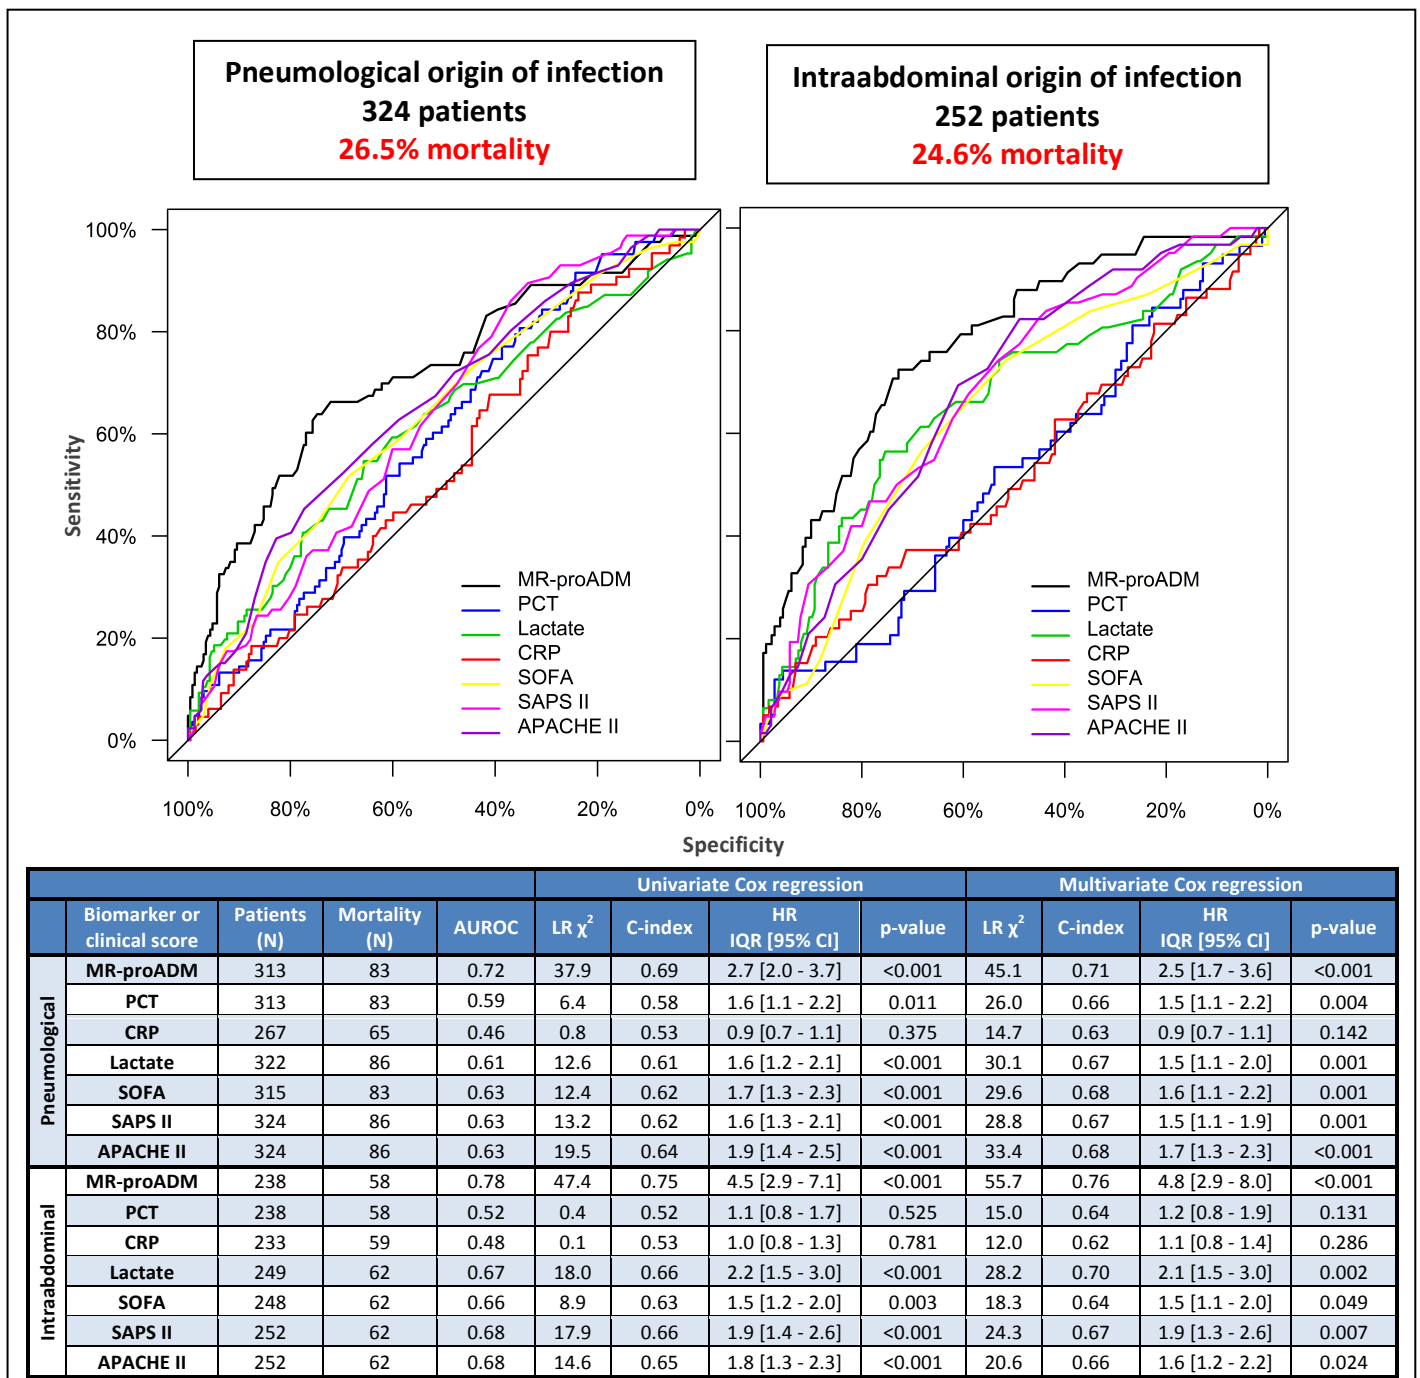

Patients with mixed origins of infection were excluded from the analysis.

APACHE II: Acute Physiological and Chronic Health Evaluation II score; CI: Confidence Interval; CRP: C-reactive protein; HR: Hazard Ratio; IQR: Interquartile range; MR-proADM: Mid-regional proadrenomedullin; N: Number; PCT: Procalcitonin; SAPS II: Simplified Acute Physiological II score; SOFA: Sequential Organ Failure Assessment score



Figure S3. Influence of microbial species on 28 day mortality prediction

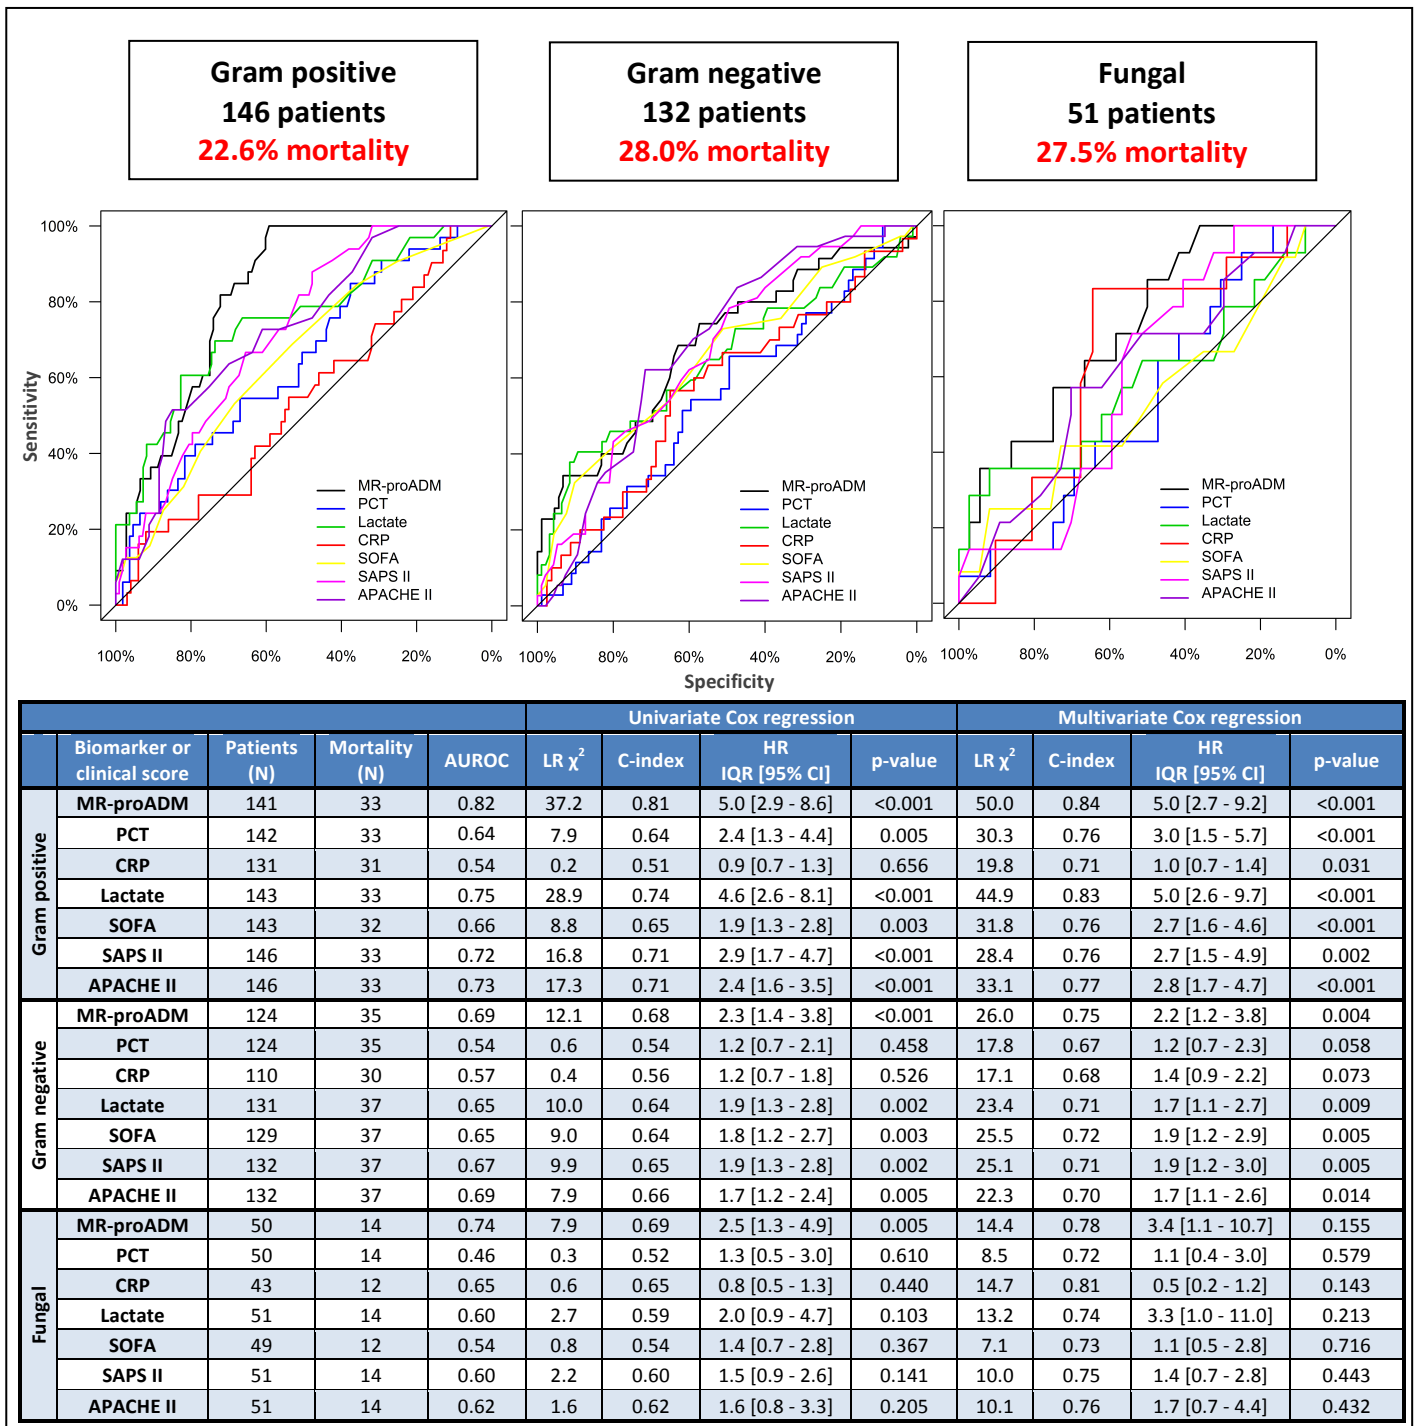

Patients with mixed microbial infections were excluded from the analysis.

APACHE II: Acute Physiological and Chronic Health Evaluation II score; CI: Confidence Interval; CRP: C-reactive protein; HR: Hazard Ratio; IQR: Interquartile range; MR-proADM: Mid-regional proadrenomedullin; N: Number; PCT: Procalcitonin; SAPS II: Simplified Acute Physiological II score; SOFA: Sequential Organ Failure Assessment score

Figure S4. Influence of mode of ICU entry on 28 day mortality prediction

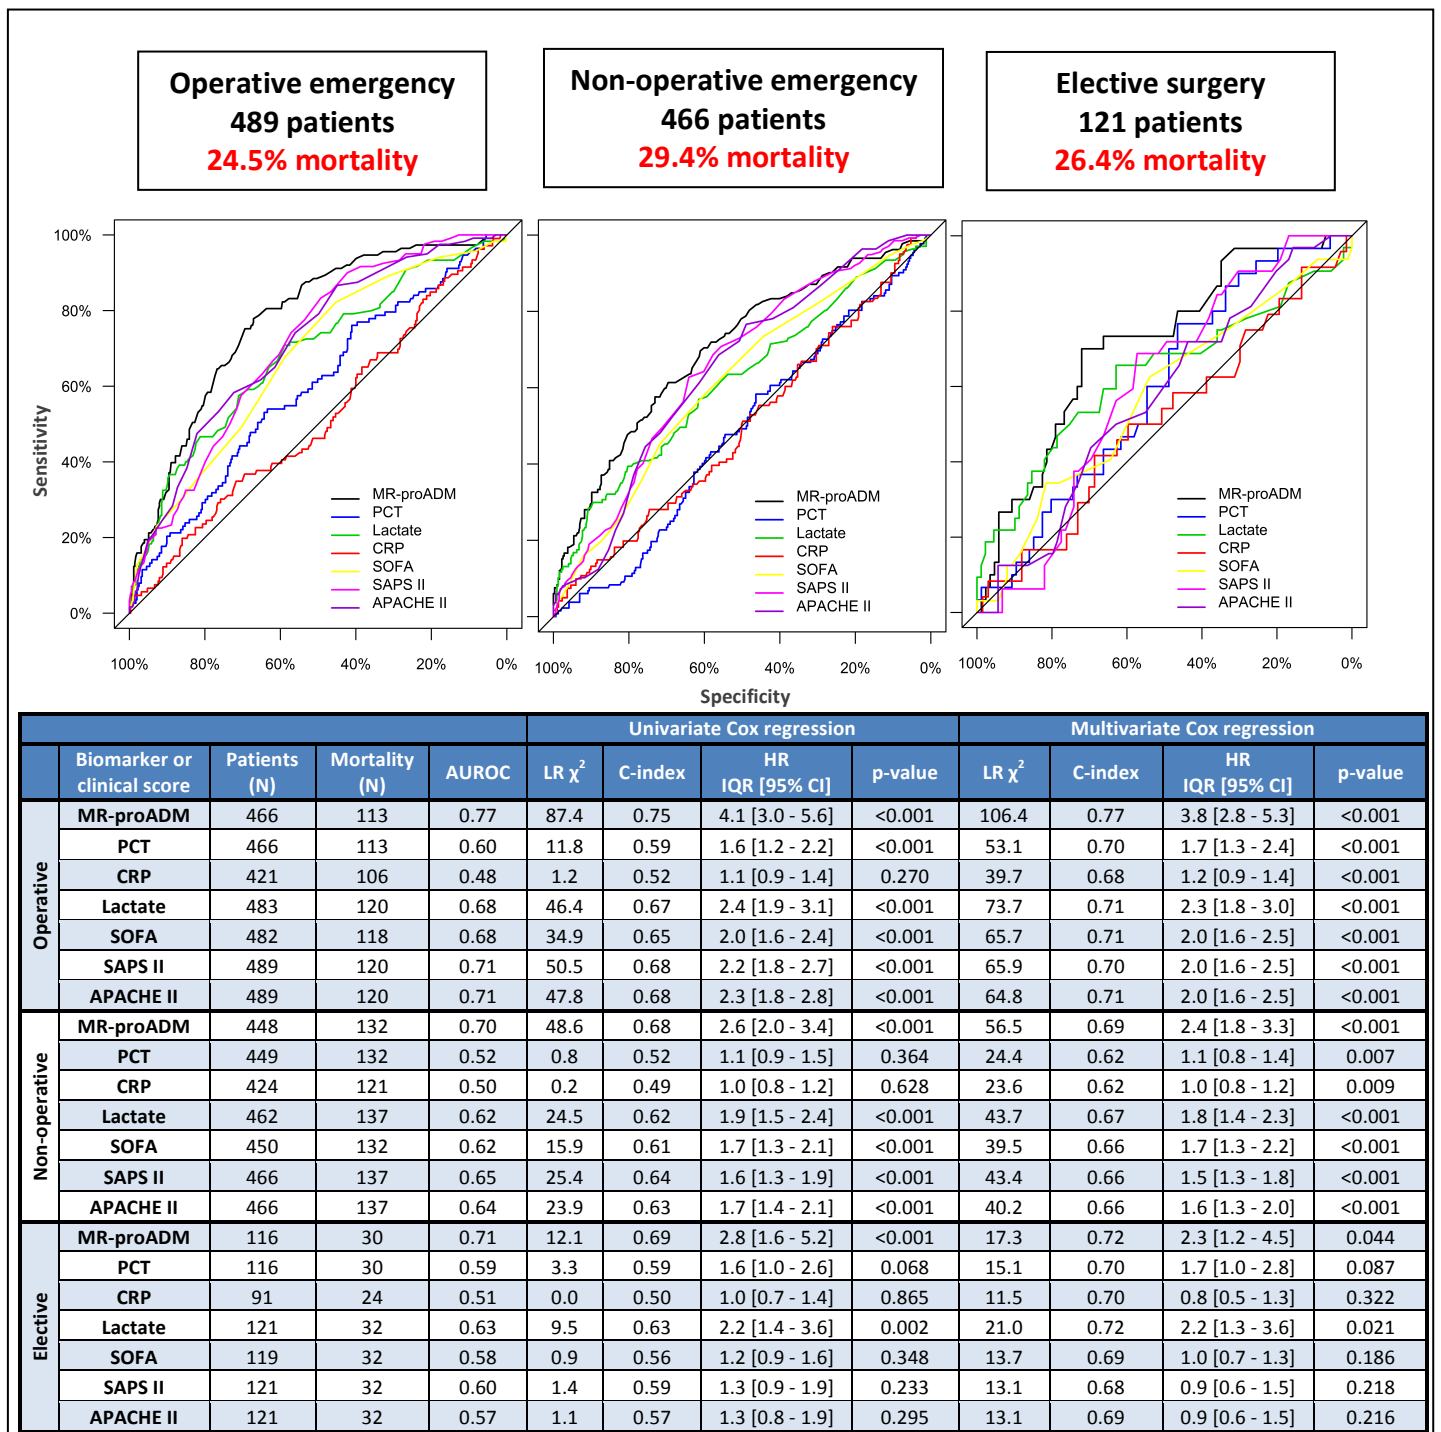

APACHE II: Acute Physiological and Chronic Health Evaluation II score; CI: Confidence Interval; CRP: C-reactive protein; HR: Hazard Ratio; IQR: Interquartile range; MR-proADM: Mid-regional proadrenomedullin; N: Number; PCT: Procalcitonin; SAPS II: Simplified Acute Physiological II score; SOFA: Sequential Organ Failure Assessment score
